# Supplementary material for: A new strategy for RRS-based determination of phosphate with a bifunctional Fe3O4 magnetic nanoparticle surface molecularly imprinted polydopamine probe
Source: Royal Society of Chemistry journal article supplement (doi:10.1039/d4ay00035h), 2024-01-01
Supplement: d4ay00035h1.pdf [file d4ay00035h1.pdf]

# A new strategy for RRS determination of phosphate with bifunctional Fe<sub>3</sub>O<sub>4</sub> magnetic nanoparticle surface molecularly imprinted polydopamine probe

Wenxin Wan <sup>a,b,c</sup>, Jie Yang<sup>a,b,c</sup>, Guiqing Wen <sup>a,b,c\*</sup>, Aihui Liang <sup>a,b,c</sup>, Zhiliang Jiang <sup>a,b,c\*</sup>

<sup>a</sup> Key Laboratory of Ecology of Rare and Endangered Species and Environmental Protection

(Guangxi Normal University), Ministry of Education, Guilin 541004, China;<sup>b</sup> Guangxi Key

Laboratory of Environmental Pollution Control Theory and Technology, Guilin 541004, China;

<sup>c</sup> Guangxi Key Laboratory of Environmental Processes and Remediation in Ecologically Fragile

Regions.

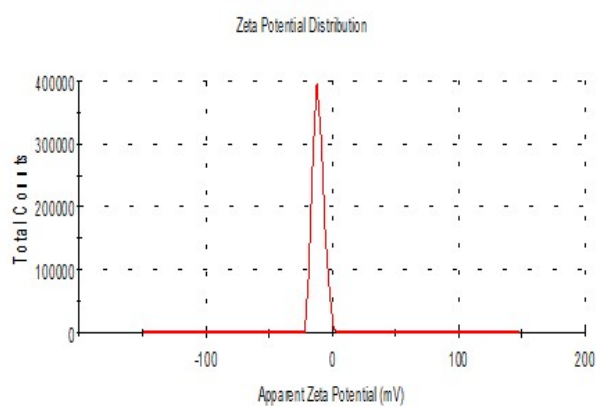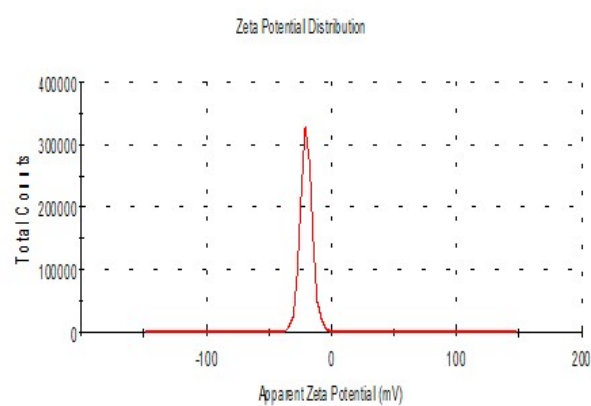

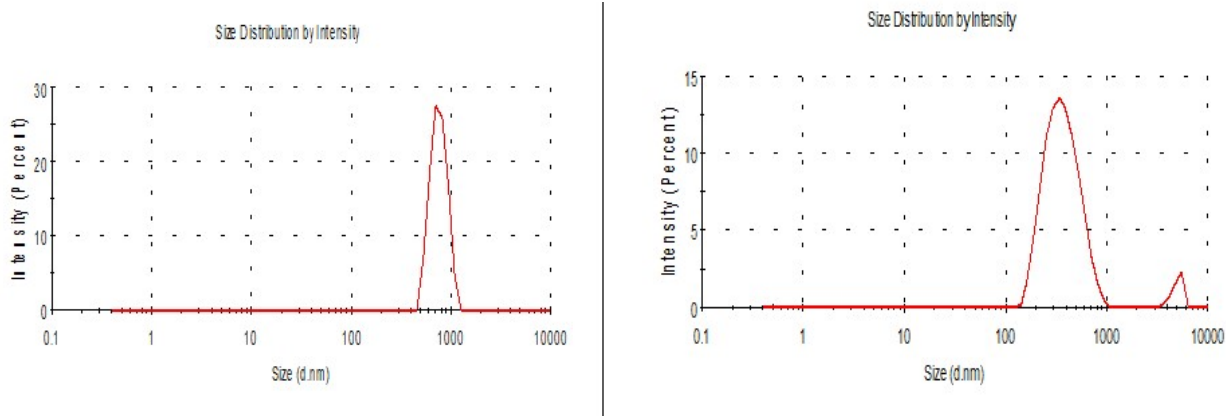

**Fig.S1.**  $\text{Fe}_3\text{O}_4$ ,  $\text{Fe}_3\text{O}_4$ @MIP potential diagram and particle size diagram

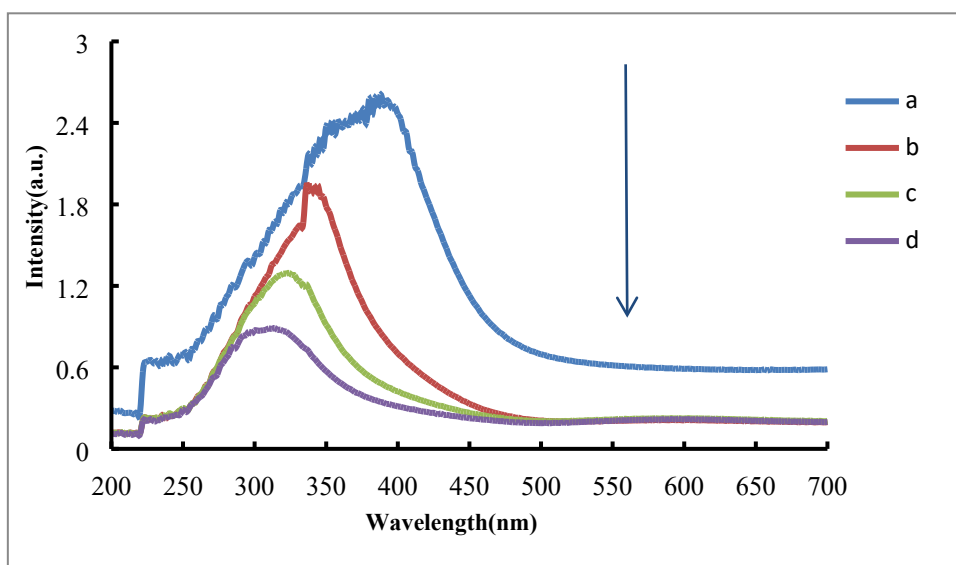

**Fig.S2.**  $\text{Fe}_3\text{O}_4$ @MIP UV spectrum of the elution template: First elution template; b: Second elution template; c: third elution template; d: fourth elution template. 3.3 RRS and Abs spectra of the  $\text{Fe}_3\text{O}_4$ @MIP-  $\text{PO}_4^{3-}$ -MAS analysis system

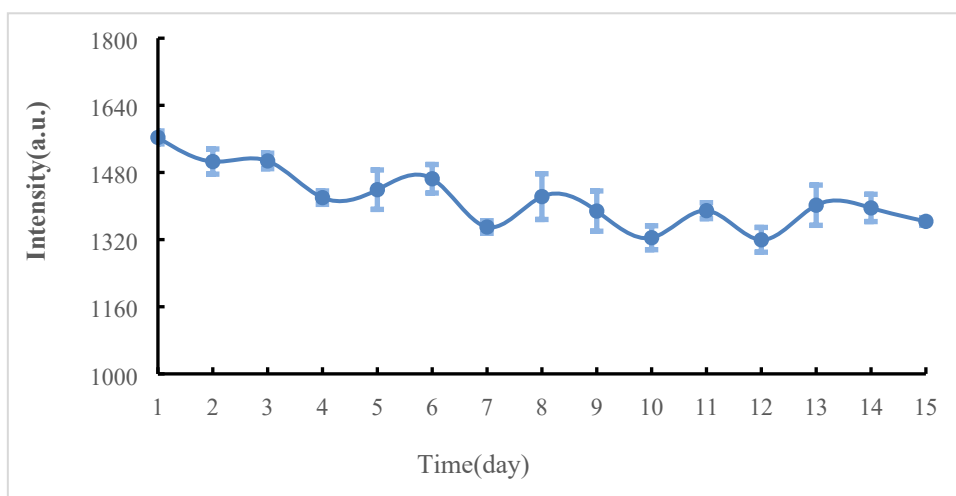

**Fig.s3.** The stability of  $\text{Fe}_3\text{O}_4$ @MIP

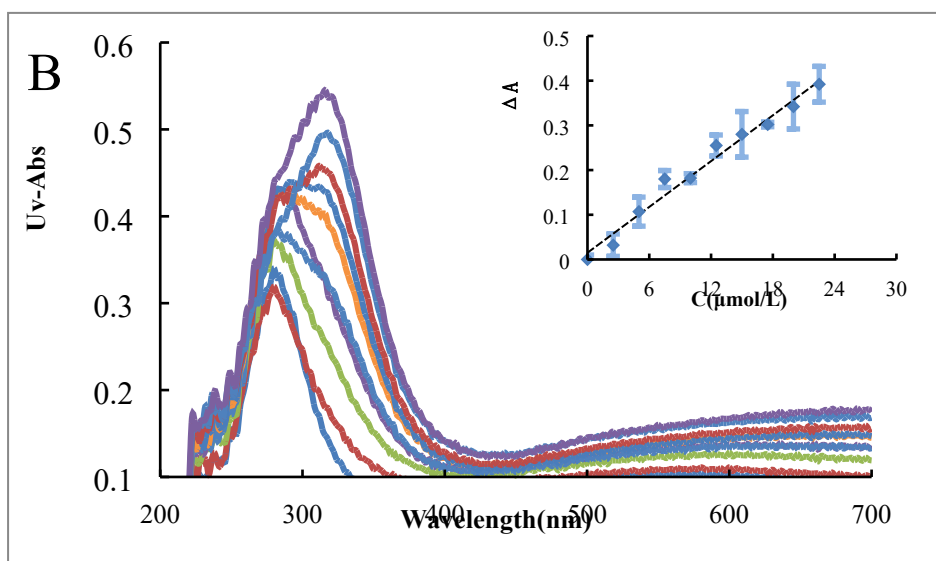

**Fig.S4.** Abs spectrum of  $\text{Fe}_3\text{O}_4@MIP-PO_4^{3-}-MSA$  ( $n=3$ )  
 0.0125g/L  $\text{Fe}_3\text{O}_4@MIP$ + 3.5 mmol/L  $\text{H}_2\text{SO}_4$  + 0.1  $\mu\text{mol/L}$  MSA + 0.055  $\mu\text{mol/L}$  Aa + (0, 2.5, 5, 7.5, 10, 12.5, 15, 17.5, 20, 22.5)  $\mu\text{mol/L}$   $PO_4^{3-}$ -25°C-10min.

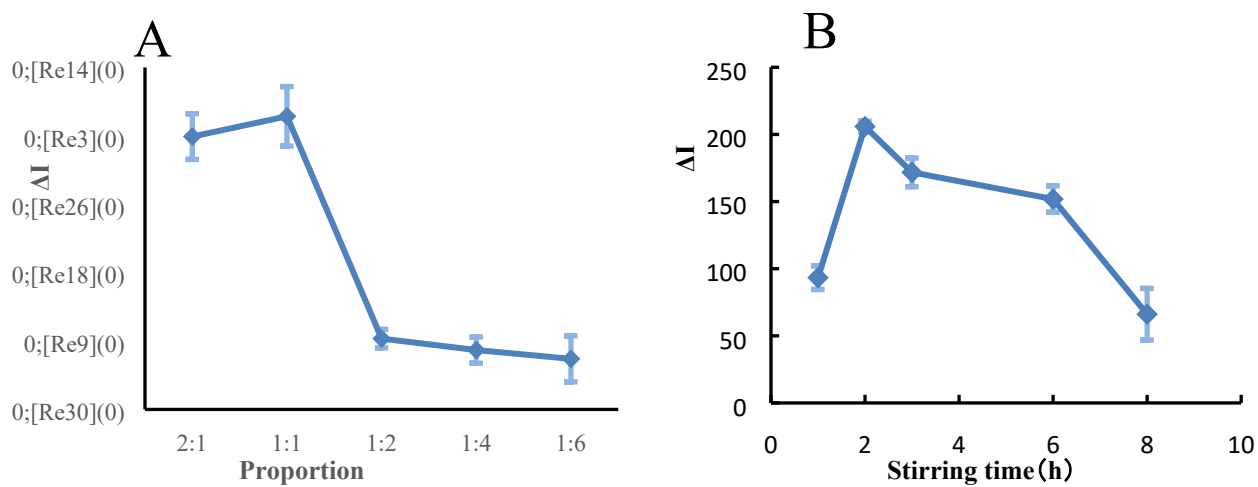

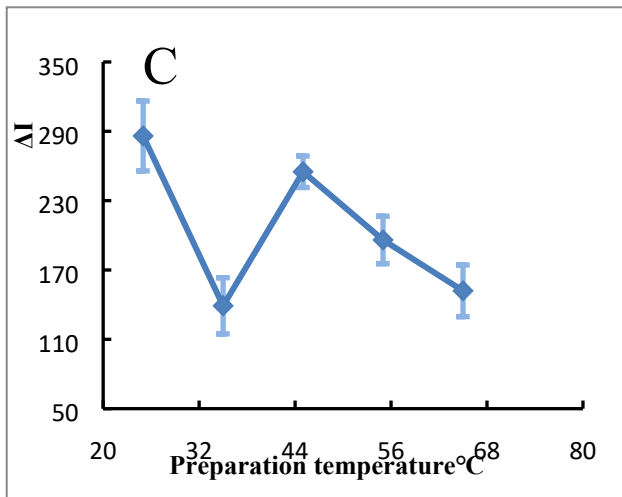

**Fig.S5. Optimization of material preparation conditions(n=3)**

A: Effect of functional monomer dosage: 0.5mmolPMo- (0.25, 0.6, 1, 2, 3mmol) PD-70mg Fe<sub>3</sub>O<sub>4</sub>NP-25°C-4h; B: Effect of preparation time: 0.5mmol PMo-0.6mmol PD-70mg Fe<sub>3</sub>O<sub>4</sub>NP-25°C- (2, 3, 4, 7, 9) h; C: Effect of preparation temperature: 0.5mmolPMo- (0.25, 0.6, 1, 2, 3) mmol PD-70mg Fe<sub>3</sub>O<sub>4</sub>NP- (25, 35, 45, 55, 65 °C-4 h.

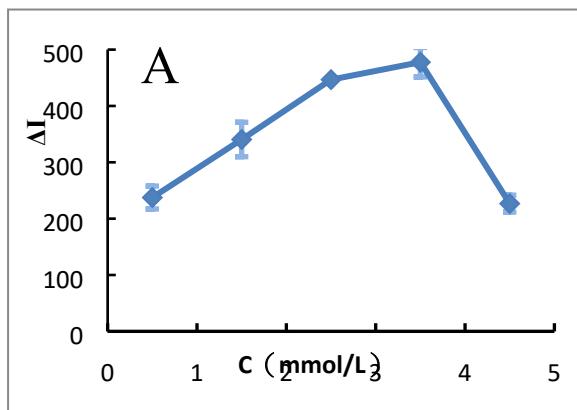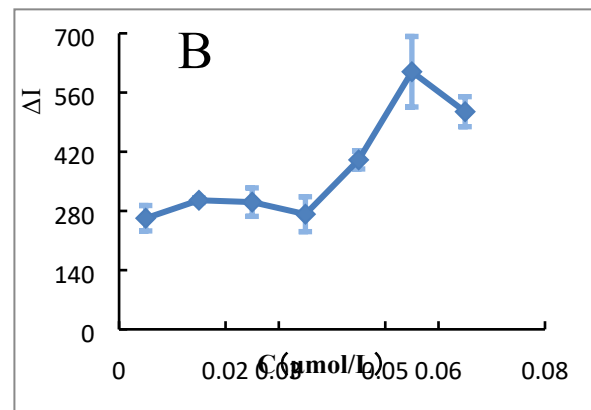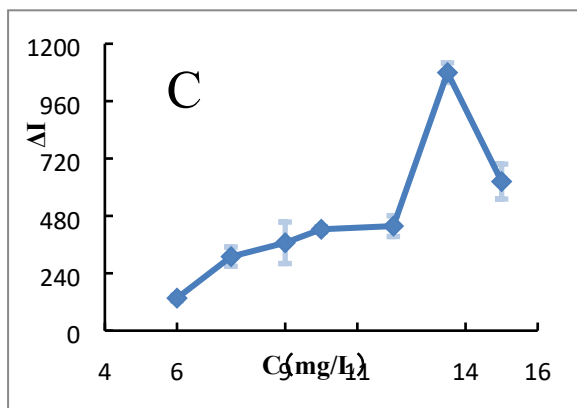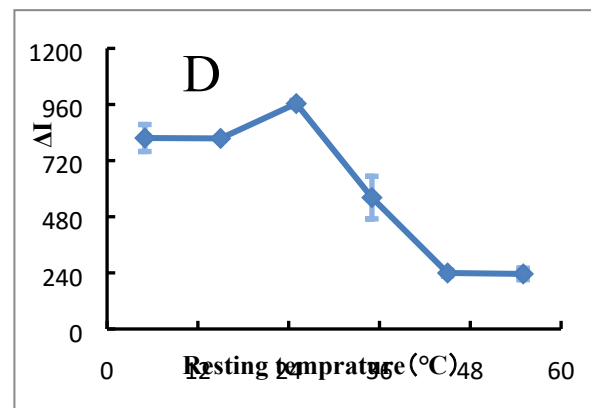

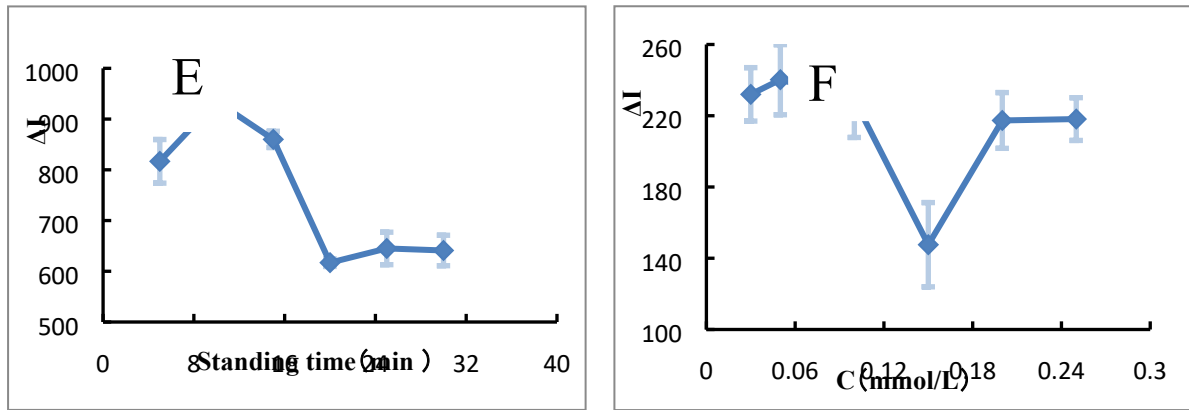

**Fig.S6.** Analysis condition optimization(n=3)

A: Effect of  $H_2SO_4$  concentration : 0.0125 g/L  $Fe_3O_4@MIP$  + ( 0.5, 1.5, 2.5, 3.5,4.5) mmol/L  $H_2SO_4$  + 50  $\mu$ mol/L MSA + 0.055  $\mu$ mol/L ascorbic acid + 10 $\mu$ mol/L  $PO_4^{3-}$ -25°C-10 min  
 B: Effect of Aa concentration: 0.0125 g/L  $Fe_3O_4@MIP$ + 3.5 mmol/L  $H_2SO_4$  + 50  $\mu$ mol/L MSA + ( 0.005,0.015,0.025,0.035,0.045,0.055,0.065 )  $\mu$ mol/L Aa+ 10  $\mu$ mol/L  $PO_4^{3-}$ -25°C -10 min;  
 C: Effect of  $Fe_3O_4@MIP$  concentration: (0.006, 0.0075, 0.009, 0.01, 0.12, 0.125, 0.135) g/L  $Fe_3O_4@MIP$  + 3.5mmol/L  $H_2SO_4$  +50  $\mu$ mol/L MSA + 0.055  $\mu$ mol/L Aa+ 10 $\mu$ mol/L  $PO_4^{3-}$ -25 °C-10min;  
 D: Effect of resting temperature: 0.0125 g/L  $Fe_3O_4@MIP$ + 3.5mmol/L $H_2SO_4$  + 50  $\mu$ mol/L MSA + 0.055  $\mu$ mol/L Aa + 10  $\mu$ mol/L  $PO_4^{3-}$ (5, 15, 25, 35, 45, 55, 65)°C-10min;  
 E: Effect of standing time: 0.0125 g/L  $Fe_3O_4@MIP$ + 3.5mmol/L  $H_2SO_4$  + 50  $\mu$ mol/L MSA + 0.055  $\mu$ mol/L Aa+ 10 $\mu$ mol/L  $PO_4^{3-}$ -25°C- (5, 10, 15, 20, 25, 30) min. F: Effect of MSA concentration: 0.0125 g/L  $Fe_3O_4@MIP$  +3.5 mmol/L  $H_2SO_4$  + (30,50,100,150,200,250) $\mu$ mol/L MSA + 0.055 $\mu$ mol/L ascorbic acid + 10 $\mu$ mol/L  $PO_4^{3-}$ -25 °C-10min

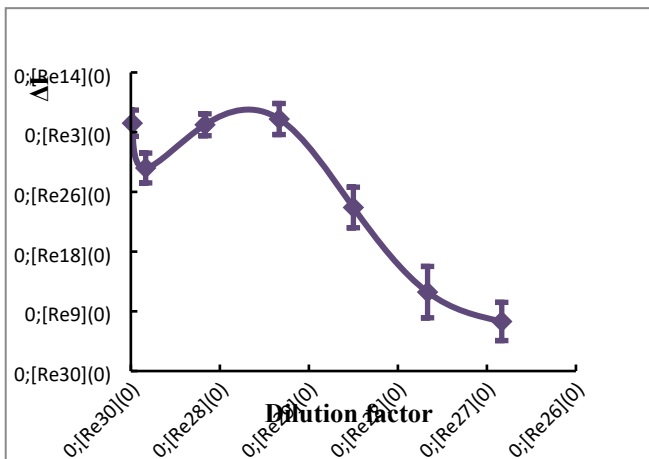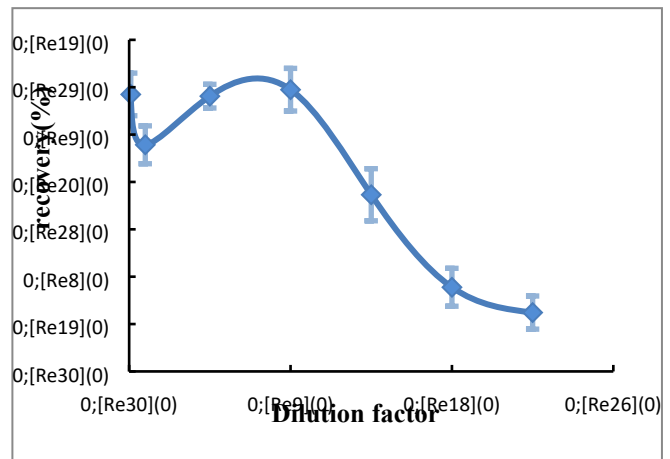

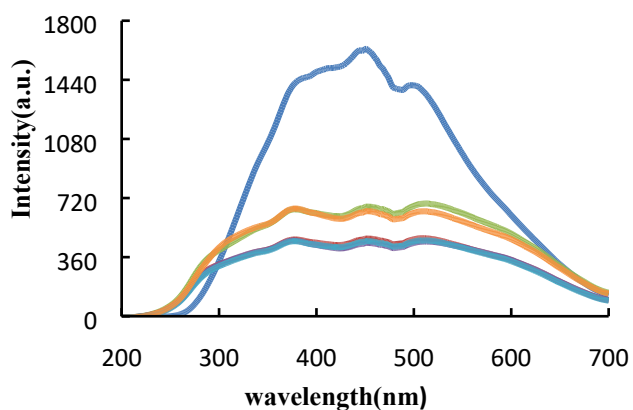

**Fig.S7.**  $\text{Fe}_3\text{O}_4\text{@MIP}$  magnetic separation enrichment  $\delta I$ -dilution ratio (n) diagram (A);  $\text{Fe}_3\text{O}_4\text{@MIP}$  magnetic separation and enrichment recovery-dilution ratio (n) diagram (B); RRS spectra with enrichment recoveries of 95.69%-116.90% (n=1,10,50,100,150) (C)

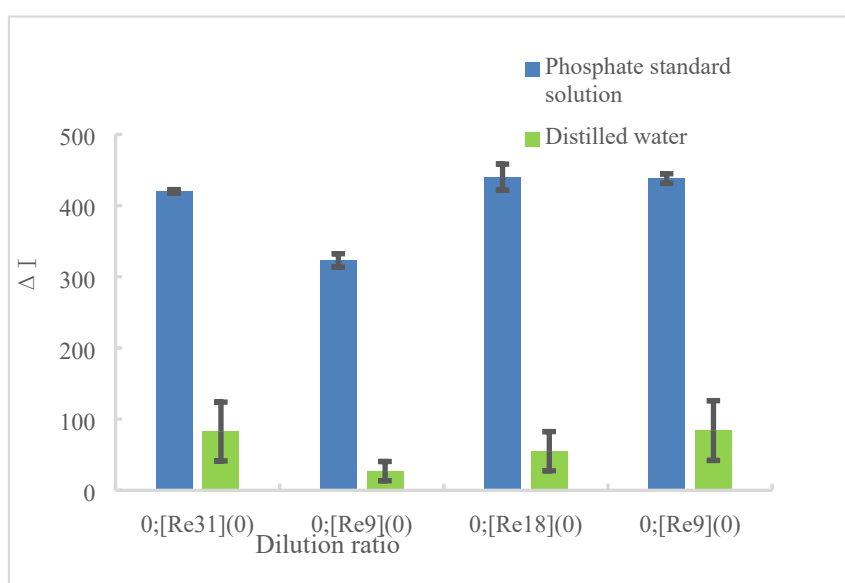

**Fig.S8.** Comparison between enriched experimental phosphate solution group and blank group

Table S1 Working curves

| Probe                               | method | Regression equation       | Linear range ( $\mu\text{mol/L}$ ) | Regression equation | Limit of detection ( $\mu\text{mol/L}$ ) |
|-------------------------------------|--------|---------------------------|------------------------------------|---------------------|------------------------------------------|
| $\text{Fe}_3\text{O}_4\text{@MIP}$  | RRS    | $\Delta I=35.2C+2.6$      | 1-22.5                             | 0.98                | 0.49                                     |
|                                     | Abs    | $\Delta A=0.0171C+0.015$  | 2.5-22.5                           | 0.98                | 1.06                                     |
| MIP                                 | RRS    | $\Delta I=17.5x + 4.6$    | 2.5-20                             | 0.99                | 0.99                                     |
| $\text{Fe}_3\text{O}_4\text{@MIPm}$ | RRS    | $\Delta I=17.24x - 2.36$  | 2.5-17.5                           | 0.99                | 1.00                                     |
| $\text{Fe}_3\text{O}_4\text{@NIP}$  | RRS    | $\Delta I=25.69x + 52.96$ | 2.5-17.5                           | 0.95                | 0.67                                     |

Table S2 Interference assays

| Interfering ion                | Relative multiple | Relative error (%) | Interfering ion               | Relative multiple | Relative error (%) |
|--------------------------------|-------------------|--------------------|-------------------------------|-------------------|--------------------|
| Ni <sup>2+</sup>               | 500               | -3.5               | SO <sub>4</sub> <sup>2-</sup> | 100               | -0.4               |
| Mn <sup>2+</sup>               | 500               | 2.9                | K <sup>+</sup>                | 100               | 1.6                |
| SiO <sub>3</sub> <sup>2-</sup> | 500               | 4.7                | Al <sup>3+</sup>              | 100               | 3.2                |
| NO <sub>3</sub> <sup>3-</sup>  | 300               | -5.0               | Ca <sup>2+</sup>              | 100               | -5.1               |
| Zn <sup>2+</sup>               | 300               | -8.7               | Co <sup>2+</sup>              | 100               | 3.9                |
| Mg <sup>2+</sup>               | 300               | -5.7               | NO <sub>2</sub> <sup>-</sup>  | 50                | 6.8                |
| Fe <sup>2+</sup>               | 100               | 2.0                | NH <sub>4</sub> <sup>+</sup>  | 50                | 5.0                |

Table S3 Determination results of PO<sub>4</sub><sup>3-</sup> in water samples(n=5)

| Sample     | Mean value (μmol/L) | Added (μmol/L) | Measured value (μmol/L) | Recovery (%) | RSD (%) | Dilution ratio | Content (μmol/L) | Photometry (μmol/L) |
|------------|---------------------|----------------|-------------------------|--------------|---------|----------------|------------------|---------------------|
| Lake1      | 10.44               | 5              | 15.00                   | 91.29        | 1.85    | 10             | 104.38           | 104.21              |
| Lake2      | 6.78                | 5              | 12.01                   | 104.62       | 8.90    | 10             | 67.82            | 70.18               |
| Lake3      | 10.38               | 5              | 15.33                   | 98.99        | 1.57    | 25             | 259.5            | 274.75              |
| Lake4      | 11.41               | 5              | 16.66                   | 104.95       | 0.74    | 25             | 285.25           | 289.25              |
| Lake5      | 10.61               | 5              | 15.33                   | 94.17        | 2.67    | 25             | 265.25           | 274.75              |
| Lake6      | 7.31                | 5              | 12.09                   | 95.59        | 3.30    | 20             | 146.2            | 142.6               |
| River1     | 7.24                | 5              | 11.78                   | 90.95        | 9.22    | 10             | 72.36            | 75.26               |
| River2     | 15.13               | 5              | 19.64                   | 90.20        | 10.34   | 20             | 302.6            | 298.2               |
| River3     | 15.94               | 5              | 21.02                   | 101.83       | 0.62    | 20             | 318              | 288.8               |
| River4     | 3.68                | 5              | 8.66                    | 99.56        | 9.62    | 10             | 36.8             | 31.5                |
| River5     | 11.54               | 5              | 16.78                   | 104.98       | 1.09    | 20             | 230.8            | 214                 |
| River6     | 7.12                | 5              | 12.19                   | 101.20       | 5.57    | 20             | 142.4            | 152                 |
| Tap water1 | 13.73               | 5              | 18.37                   | 92.67        | 2.90    | 10             | 137.32           | 130.87              |
| Tap water2 | 1.63                | 5              | 6.98                    | 107.22       | 8.54    | 10             | 16.3             | 18.4                |
| Tap water3 | 1.77                | 5              | 7.16                    | 107.79       | 9.62    | 10             | 17.7             | 19                  |
| Tap water4 | 6.03                | 5              | 11.54                   | 110.19       | 7.24    | 20             | 120.6            | 131                 |
| Tap water5 | 6.21                | 5              | 11.55                   | 106.25       | 0.91    | 20             | 124.2            | 123.6               |
| Tap water6 | 2.05                | 5              | 7.39                    | 106.77       | 8.6     | 20             | 41               | 47.6                |

Note: Mean value refers to the average value of 5 measurements before adding standard to the water sample. Measured value refers to the measured value of the

sample after spiking.  $\text{Recovery} = 100 \times (\text{Measured value} - \text{Mean value}) / \text{Added concentration}$ .
